# Supplementary material for: Dupilumab Efficacy on Asthma Functional, Inflammatory, and Patient-Reported Outcomes across Different Disease Phenotypes and Severity: A Real-Life Perspective
Source: MDPI journal article supplement (doi:10.3390/biomedicines12020390), 2024-02-08

Figure S1: Trend of lung function parameters over dupilumab treatment, including individual data plotting. Time on X-axis is expressed in months. The grey area indicates the 0.95 confidential interval

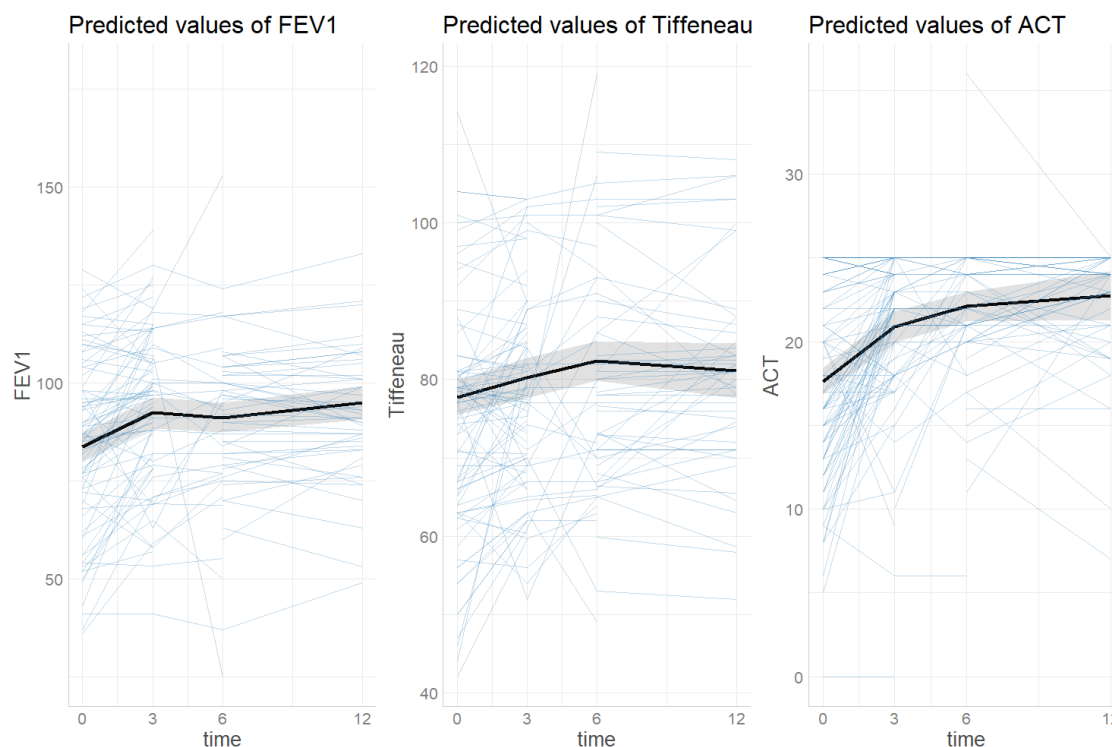

Figure S2: Change of different asthma-related outcomes during dupilumab treatment, including individual data plotting. OCS= oral corticosteroids. Time on X-axis is expressed in months. The grey area indicates the 0.95 confidential interval

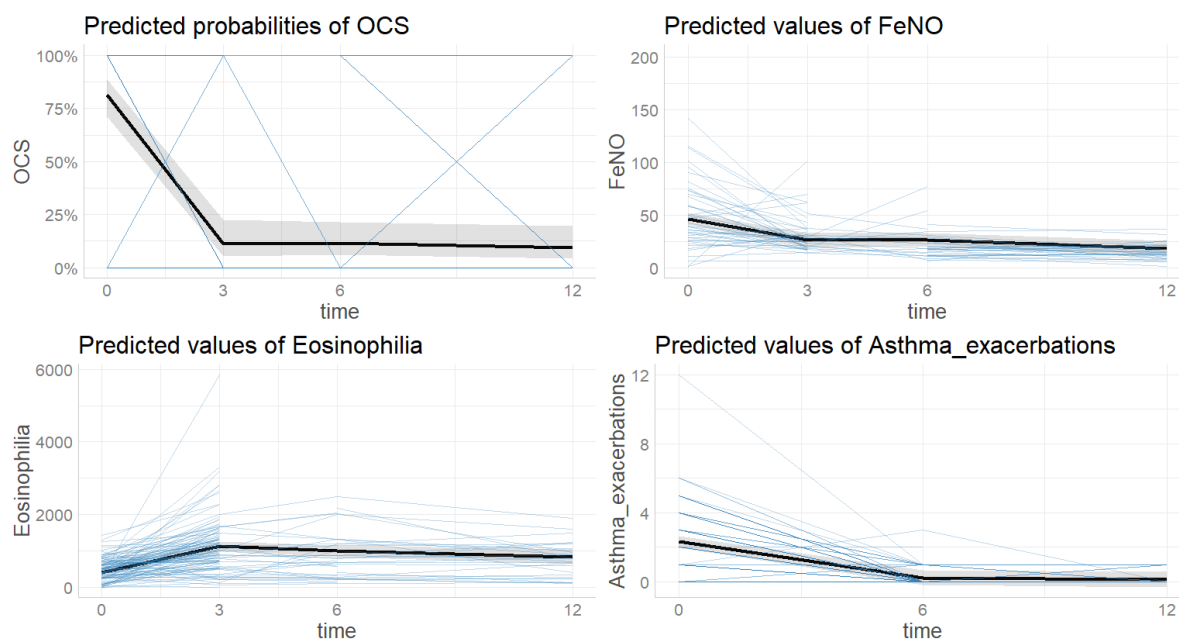

Figure S3: Trend of nasal polyps related outcomes over dupilumab treatment, including individual data plotting. Time on X-axis is expressed in months. The grey area indicates the 0.95 confidential interval. SNOT22= sinonasal outcome test; VAS= visual analogic scale; NPS= nasal polyp score.

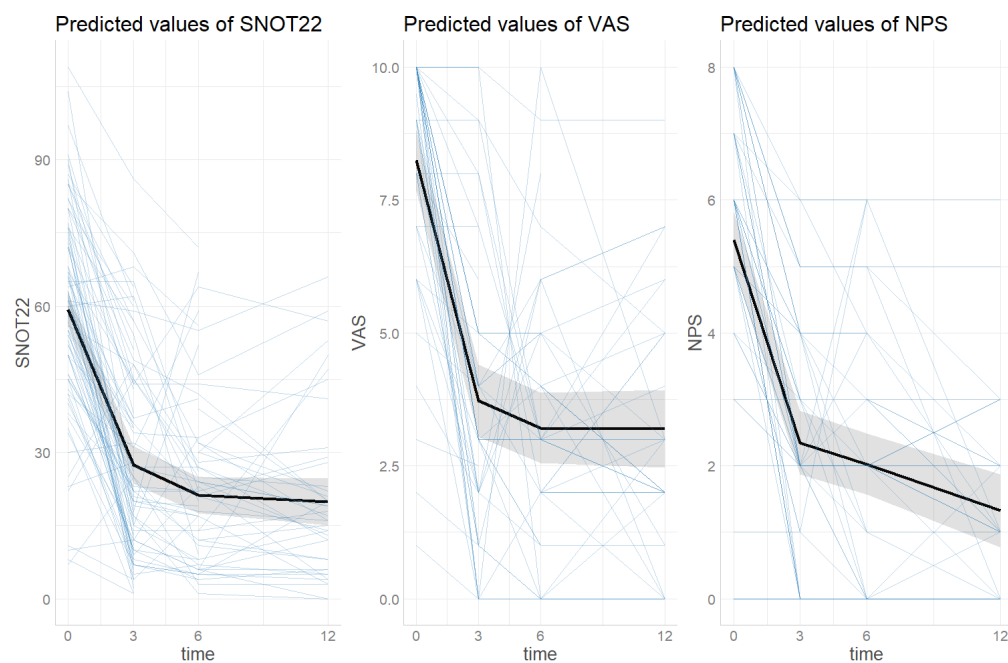

Supplement: s1 [file s1]
